# Supplementary material
Source: MDPI journal article supplement (https://www.mdpi.com/2571-6255/6/11/426)
Supplement: s1 [file s1 › fire-2596114-supplementary.pdf]

# Updated Land Use and Land Cover Information Improves Biomass Burning Emission Estimates

## Supplementary Materials

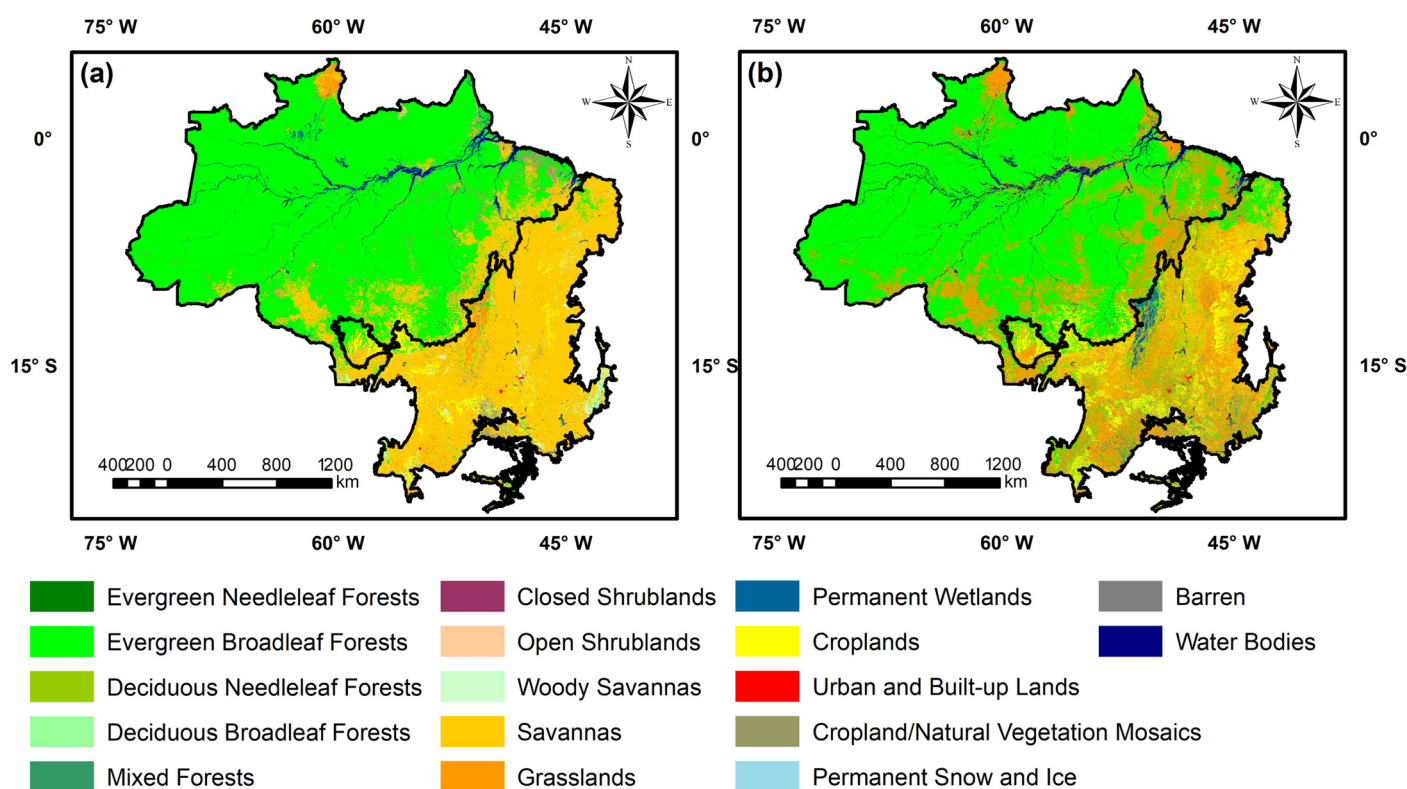

**Figure S1.** Land use and land cover (LULC) in the Amazon and Cerrado biomes for the year 2020 considering the old (a— MCD12Q1 collection 5.1, year 2013) and new (b—MapBiomas collection 6.0, year 2020) LULC information implemented on PREP-CHEM-SRC. The MapBiomas original LULC classes were reclassified to match the IGBP classification scheme.

**Table S1.** Difference in the annual and total PM<sub>2.5</sub> emitted from biomass burning (Gg) in the Amazon biome per LULC during the 2002-2020 time series when comparing the estimates obtained with the new (MapBiomass collection 6.0) and old (MCD12Q1 collection 5.1) LULC information. The forest-related class comprises the evergreen needleleaf forest, evergreen broadleaf forest, deciduous needleleaf forest, deciduous broadleaf forest, mixed forest, and the cropland/natural vegetation mosaic LULC classes. The savanna-related class comprises the closed shrubland, open shrubland, woody savanna, savanna, and grassland LULC classes. The croplands class is represented by the cropland LULC class. The other class comprises the permanent wetlands LULC class.

| LULC            | 2002 | 2003 | 2004 | 2005 | 2006 | 2007 | 2008 | 2009 | 2010 | 2011 | 2012 | 2013 | 2014 | 2015 | 2016 | 2017 | 2018 | 2019 | 2020 | 2002-2020 |
|-----------------|------|------|------|------|------|------|------|------|------|------|------|------|------|------|------|------|------|------|------|-----------|
| Forest-related  | -530 | -583 | -699 | -887 | -509 | -76  | -86  | -175 | -60  | -22  | -116 | -37  | -120 | -204 | -188 | -244 | -162 | -305 | -272 | -5276     |
| Savanna-related | 524  | 553  | 626  | 864  | 498  | 45   | 71   | 168  | 49   | 20   | 106  | 30   | 103  | 177  | 172  | 224  | 150  | 281  | 241  | 4903      |
| Croplands       | 10   | 30   | 72   | 21   | 12   | 28   | 15   | 5    | 14   | 4    | 12   | 7    | 16   | 24   | 17   | 20   | 10   | 24   | 30   | 372       |
| Others          | -4   | 0    | 1    | 1    | 0    | 3    | 0    | 2    | -3   | -2   | -1   | 0    | 1    | 3    | 0    | 0    | 1    | 0    | 1    | 0         |

**Table S2.** Difference in the annual and total PM<sub>2.5</sub> emitted from biomass burning (Gg) in the Cerrado biome per LULC during the 2002-2020 time series when comparing the estimates obtained with the new (MapBiomass collection 6.0) and old (MCD12Q1 collection 5.1) LULC information. The forest-related class comprises the evergreen needleleaf forest, evergreen broadleaf forest, deciduous needleleaf forest, deciduous broad-leaf forest, mixed forest, and the cropland/natural vegetation mosaic LULC classes. The savanna-related class comprises the closed shrub-land, open shrubland, woody savanna, savanna, and grassland LULC classes. The croplands class is represented by the cropland LULC class. The other class comprises the permanent wetlands LULC class.

| LULC            | 2002 | 2003 | 2004 | 2005 | 2006 | 2007 | 2008 | 2009 | 2010 | 2011 | 2012 | 2013 | 2014 | 2015 | 2016 | 2017 | 2018 | 2019 | 2020 | 2002-2020 |
|-----------------|------|------|------|------|------|------|------|------|------|------|------|------|------|------|------|------|------|------|------|-----------|
| Forest-related  | 86   | 85   | 77   | 109  | 51   | 226  | 71   | 37   | 150  | 41   | 118  | 50   | 76   | 117  | 109  | 116  | 36   | 55   | 66   | 1676      |
| Savanna-related | -146 | -148 | -144 | -173 | -86  | -405 | -124 | -53  | -360 | -92  | -222 | -96  | -145 | -196 | -199 | -236 | -77  | -164 | -151 | -3216     |
| Croplands       | 17   | 22   | 33   | 17   | 13   | 44   | 23   | 10   | 65   | 22   | 31   | 23   | 28   | 28   | 25   | 47   | 23   | 45   | 44   | 559       |
| Others          | 43   | 41   | 34   | 47   | 22   | 135  | 30   | 5    | 145  | 29   | 72   | 23   | 42   | 51   | 65   | 73   | 19   | 64   | 42   | 981       |
